# Supplementary material
Source: Research Square preprint supplement (doi:10.21203/rs.3.rs-9507648/v1)
Supplement: Supplementary file 1 [file 47baa50c01fe2837e6e629f1.docx]

## Supplemental Method S1 – Detailed Image Preprocessing Procedure

(1) **Discarding initial volumes**: The first 10 volumes were removed to eliminate magnetization saturation effects and allow signal stabilization; (2) **Slice timing correction**: The interleaved ascending sequence ([2:2:36, 1:2:35]) was applied with the first slice as the reference to correct for inter-slice temporal differences; (3) **Head motion correction**: A six-parameter rigid body transformation model was used to correct for head motion, generating Friston-24 parameters for subsequent nuisance regression; (4) **Spatial normalization**: A two-step registration approach (new segment) was used to normalize individual images into the Montreal Neurological Institute (MNI) standard space, with resampling to an isotropic voxel size of 3 mm × 3 mm × 3 mm; (5) **Spatial smoothing**: A Gaussian kernel with a full width at half maximum (FWHM) of 6 mm × 6 mm × 6 mm was applied to reduce deformation noise induced by spatial normalization and improve data normality; (6) **Nuisance covariate regression**: Based on the general linear model (GLM), Friston-24 head motion parameters, white matter signals, cerebrospinal fluid signals, and global mean signals were regressed as nuisance covariates; (7) **Detrending**: Linear trends were removed to eliminate signal drift caused by scanner heating or physiological rhythms; (8) **Temporal filtering**: A temporal band-pass filter (0.01–0.08 Hz) was applied to preserve low-frequency physiological signals and remove high-frequency noise.
