# Supplementary material
Source: Research Square preprint supplement (doi:10.21203/rs.3.rs-9507648/v1)
Supplement: Supplementary file 2 [file 962b5ea3e2e1cbf765da6672.docx]

## Supplemental Method S3 – Detailed Statistical Analysis

Demographic and clinical data were analyzed using IBM SPSS Statistics 26.0. Sex differences between groups were compared using the chi-square test, with results presented as frequency (percentage) [n (%)]. Normality of continuous variables was assessed using the Shapiro-Wilk test. Since all continuous variables violated normality, group comparisons were performed using the Mann-Whitney *U* test, with results reported as median (interquartile range) [M (P25, P75)]. All tests were two-tailed, and a significance level of *p* < 0.05 was adopted.

Group comparisons of neuroimaging data were performed using RESTplus V1.27 software. Based on GLM, covariates (age, sex, education years, and head motion parameters) were first regressed out using multiple linear regression. Independent-sample t-tests were then conducted on the normalized ALFF, PerAF, KCC-ReHo, and Weighted-DC maps between the two groups. Multiple comparison correction was applied using GRF theory (voxel-level *p* < 0.001, cluster-level *p* < 0.05, two-tailed). Significant brain regions (anatomical location, MNI coordinates, cluster size) were identified using xjView software.

Correlation analyses were performed using SPSS 26.0. Normalized signal values of ALFF, PerAF, KCC-ReHo, and Weighted-DC in significant brain regions of the LCI group were extracted using the RESTplus V1.27 toolbox. Spearman’s rank correlation analysis (due to non-normal distribution) was then conducted between these values and PSQI, ISI, MoCA, SAS, and SDS scores. A threshold of *p* < 0.05 was considered statistically significant.
