# Supplementary material
Source: Research Square preprint supplement (doi:10.21203/rs.3.rs-9507648/v1)
Supplement: Supplementary file 3 [file aae8af454b5df5f9591cb7c5.docx]

## Supplemental Method S2 – Detailed Calculation of Functional Metrics

S2.1 ALFF Calculation

The filtered time series of each voxel was transformed into the frequency domain using the fast Fourier transform (FFT) to obtain the power spectral density. The square root of the power spectrum was then computed at each frequency, and the average square root across the 0.01–0.08 Hz frequency band was calculated for each voxel to obtain the ALFF value. Subsequently, each voxel's ALFF value was divided by the global mean ALFF across the whole brain for standardization, yielding the mean ALFF (mALFF) for subsequent group comparisons.

S2.2 KCC-ReHo Calculation

ReHo was computed based on unsmoothed preprocessed data. For each voxel, Kendall's coefficient of concordance (KCC) was calculated between the time series of the target voxel and its 26 neighboring voxels (forming a 3 × 3 × 3 cube), generating the KCC-ReHo map. The formula for KCC is:

where W is Kendall's coefficient of concordance, R_i is the sum of ranks of the i-th time point, K is the number of time series (27 voxels), and n is the number of time points. Each individual's KCC-ReHo map was then standardized by dividing by the global mean KCC value within the whole-brain mask. Finally, spatial smoothing was applied to the standardized KCC-ReHo maps using a Gaussian kernel with a FWHM of 6 mm for subsequent statistical analysis.

S2.3 Weighted Degree Centrality Calculation

Weighted-DC was calculated based on unsmoothed preprocessed data. First, Pearson correlation analysis was performed between the time series of each voxel and all other voxels in the whole brain to construct a correlation matrix **R** = (rij), where *j*= 1…*N* (*N* represents the total number of voxels), and *i* ≠ 1. Subsequently, for each voxel, correlation coefficients satisfying rij ≥ 0.25 were Fisher Z-transformed and summed to obtain the Weighted-DC. The Fisher Z-transformation formula is:

To facilitate group comparisons, each voxel's Weighted-DC value was further standardized by dividing by the global mean Weighted-DC of that individual's whole brain.
